# Supplementary material for: Effect of In Vitro Micropropagation on the Chemical, Antioxidant, and Biological Characteristics of Senecio nutans Sch. Bip., an Endemic Plant of the Atacama Desert Andean Region
Source: MDPI journal article supplement (doi:10.3390/plants13060755), 2024-03-07
Supplement: s1 [file s1]

## Supporting Information

# Effect of In Vitro Micropropagation on the Chemical, Antioxidant, and Biological Characteristics of *Senecio nutans* Sch. Bip., an Endemic Plant of the Atacama Desert Andean Region

Claudio Parra <sup>1,\*</sup>, Patricio Munoz-Torres <sup>2</sup>, Hugo Escobar <sup>2</sup>, Mario J. Simirgiotis <sup>3</sup>, Gabriela Contreras-Contreras <sup>4</sup>, Álvaro Ruiz-Fernández <sup>5</sup>, Cristian Maulen <sup>1</sup>, Maximiliano Martínez-Cifuentes <sup>1,\*</sup> and María Salomé Mariotti-Celis <sup>4,\*</sup>

<sup>1</sup> Departamento de Química Orgánica, Facultad de Ciencias Químicas, Universidad de Concepción, Concepción 4070371, Chile; cmaulen2018@udec.cl

<sup>2</sup> Facultad de Ciencias Agronómicas, Universidad de Tarapacá, Arica 1000000, Chile; pmunozt@academicos.uta.cl (P.M.-T.); hescobar@academicos.uta.cl (H.E.)

<sup>3</sup> Facultad de Ciencias, Instituto de Farmacia, Universidad Austral de Chile, Valdivia 5110566, Chile; mario.simirgiotis@uach.cl

<sup>4</sup> Escuela de Nutrición y Dietética, Facultad de Medicina, Universidad Finis Terrae, Santiago 7501015, Chile; gcontreras@uft.cl

<sup>5</sup> Computational Biology Lab, Fundación Ciencia & Vida, Santiago 8580702, Chile; aruiz@dlab.cl

\* Correspondence: cparra@udec.cl (C.P.); maxmartinez@udec.cl (M.M.-C.); mmariotti@uft.cl (M.S.M.-C.)

**Table S1.** Morphogenic responses of *Senecio nutans* explants cultured in MS medium with 2-iP in the explant establishment stage

| 2-iP<br>( $\mu$ M) | Survival (%)                 | Sprouting<br>(%)             | No.<br>shoots/explant      | Rooting (%)                  |
|--------------------|------------------------------|------------------------------|----------------------------|------------------------------|
| -                  | 40.1 $\pm$ 5.6 <sup>d</sup>  | 50.8 $\pm$ 4.8 <sup>c</sup>  | 1.8 $\pm$ 0.3 <sup>b</sup> | 57.2 $\pm$ 3.3 <sup>b</sup>  |
| 2.5                | 60.3 $\pm$ 6.5 <sup>bc</sup> | 67.5 $\pm$ 4.7 <sup>b</sup>  | 2.4 $\pm$ 0.3 <sup>a</sup> | 57.2 $\pm$ 3.3 <sup>b</sup>  |
| 3,5                | 63.1 $\pm$ 5,6 <sup>bc</sup> | 69.5 $\pm$ 4.1 <sup>b</sup>  | 2.4 $\pm$ 0.3 <sup>a</sup> | 58.6 $\pm$ 2.8 <sup>b</sup>  |
| 5.0                | 77.9 $\pm$ 13.9 <sup>a</sup> | 85.4 $\pm$ 9.2 <sup>a</sup>  | 2.5 $\pm$ 0.4 <sup>a</sup> | 64.6 $\pm$ 4.9 <sup>a</sup>  |
| 7.0                | 71.9 $\pm$ 12.0 <sup>a</sup> | 85.4 $\pm$ 9.2 <sup>a</sup>  | 2.5 $\pm$ 0.4 <sup>a</sup> | 61.7 $\pm$ 2.0 <sup>ab</sup> |
| 10.0               | 55.1 $\pm$ 8.5 <sup>c</sup>  | 84.0 $\pm$ 12.1 <sup>a</sup> | 2.9 $\pm$ 0.5 <sup>a</sup> | 58.0 $\pm$ 4.5 <sup>b</sup>  |

2-iP: 2-Isopentyl adenine. Values are the mean of three replicates  $\pm$  SD. Means with different letters differ significantly by ANOVA followed by Fisher's test ( $p < 0.05$ ).

**Table S2.** Morphogenic responses of *Senecio nutans* shoots, obtained *in vitro* and cultivated in MS medium with 2-iP in the proliferation stage.

| 2-iP<br>( $\mu$ M) | Survival (%)                 | Sprouting<br>(%)             | No.<br>shoots/explant      | Rooting (%)                  |
|--------------------|------------------------------|------------------------------|----------------------------|------------------------------|
| -                  | 45.0 $\pm$ 7.9 <sup>b</sup>  | 47.4 $\pm$ 4.8 <sup>c</sup>  | 2.6 $\pm$ 0.5 <sup>b</sup> | 29.6 $\pm$ 6.5 <sup>c</sup>  |
| 2.5                | 77.9 $\pm$ 13.9 <sup>a</sup> | 68.7 $\pm$ 3.3 <sup>b</sup>  | 4.6 $\pm$ 0.7 <sup>a</sup> | 59.4 $\pm$ 3.8 <sup>b</sup>  |
| 3,5                | 84.0 $\pm$ 12.1 <sup>a</sup> | 74.8 $\pm$ 10.5 <sup>b</sup> | 4.5 $\pm$ 0.7 <sup>a</sup> | 62.3 $\pm$ 7.2 <sup>b</sup>  |
| 5.0                | 84.0 $\pm$ 12.0 <sup>a</sup> | 90.0 $\pm$ 0.0 <sup>a</sup>  | 4.6 $\pm$ 0.5 <sup>a</sup> | 74.1 $\pm$ 11.2 <sup>a</sup> |
| 7.0                | 95.8 $\pm$ 12.1 <sup>a</sup> | 85.4 $\pm$ 9.2 <sup>a</sup>  | 4.6 $\pm$ 0.5 <sup>a</sup> | 60.3 $\pm$ 4.3 <sup>b</sup>  |
| 10.0               | 84.0 $\pm$ 12.0 <sup>a</sup> | 90.0 $\pm$ 0.0 <sup>a</sup>  | 4.5 $\pm$ 0.8 <sup>a</sup> | 53.4 $\pm$ 1.8 <sup>b</sup>  |

2-iP: 2-Isopentyl adenine. Values are the mean of three replicates  $\pm$  SD. Means with different letters differ significantly by ANOVA followed by Fisher's test ( $p < 0.05$ ).

**Table S3.** Morphogenic responses of *Senecio nutans* shoots obtained *in vitro* and cultivated in MS medium with IBA at the rooting stage.

| IBA<br>( $\mu$ M) | Survival<br>(%) | Sprouting<br>(%) | No.<br>shoots/explant      | Rooting (%)                 |
|-------------------|-----------------|------------------|----------------------------|-----------------------------|
| -                 | 100             | 100              | 1.5 $\pm$ 0.2 <sup>b</sup> | 40.1 $\pm$ 5.6 <sup>a</sup> |
| 2.5               | 100             | 100              | 1.5 $\pm$ 0.1 <sup>b</sup> | 27.8 $\pm$ 6.5 <sup>b</sup> |
| 3,5               | 100             | 100              | 1.6 $\pm$ 0.1 <sup>b</sup> | 26.8 $\pm$ 5.6 <sup>b</sup> |
| 5.0               | 100             | 100              | 1.5 $\pm$ 0.1 <sup>b</sup> | 27.1 $\pm$ 5.3 <sup>b</sup> |
| 7.0               | 100             | 100              | 1.6 $\pm$ 0.1 <sup>b</sup> | 40.1 $\pm$ 5.6 <sup>a</sup> |
| 10.0              | 100             | 100              | 1.9 $\pm$ 0.2 <sup>a</sup> | 47.3 $\pm$ 4.7 <sup>a</sup> |

IBA: Indole-3-butyric acid. Values are the mean of three replicates  $\pm$  SD. Means with different letters differ significantly by ANOVA followed by Fisher's test ( $p < 0.05$ ).

Optimized geometries at DFT M06-2x/6-311+G(d,p) level

4-hydroxy-3-(3-methyl-2-butenyl) acetophenone

Neutral

0 1

|   |             |             |             |
|---|-------------|-------------|-------------|
| C | 1.43739400  | 2.20982700  | -0.43901900 |
| C | 2.35666400  | 1.17871200  | -0.52668000 |
| C | 2.03652400  | -0.09179100 | -0.04745300 |
| C | 0.77884600  | -0.30067200 | 0.52447500  |
| C | -0.16011400 | 0.71768500  | 0.62841300  |
| C | 0.18574800  | 1.97843300  | 0.13071000  |
| H | 1.68364700  | 3.19919600  | -0.81243600 |
| H | 3.33364600  | 1.33702500  | -0.96721100 |
| H | 0.50831400  | -1.28117500 | 0.90303600  |
| C | 3.05699100  | -1.17762100 | -0.16936000 |
| C | -1.53364400 | 0.47998500  | 1.21410400  |
| H | -1.80933800 | 1.33867000  | 1.83229600  |
| H | -1.49430200 | -0.39128200 | 1.86772200  |

|   |             |             |             |
|---|-------------|-------------|-------------|
| C | -2.56593000 | 0.30998200  | 0.12764700  |
| H | -2.80271000 | 1.22237900  | -0.41489800 |
| C | -3.17317000 | -0.81865200 | -0.24507900 |
| C | -2.94487300 | -2.17205900 | 0.37302500  |
| H | -2.56910100 | -2.86862700 | -0.38349000 |
| H | -2.23790200 | -2.15982600 | 1.20056800  |
| H | -3.89015500 | -2.58494800 | 0.73915200  |
| C | -4.17084300 | -0.82118300 | -1.37343900 |
| H | -5.14470200 | -1.18096500 | -1.02623800 |
| H | -4.30184100 | 0.17460000  | -1.79790100 |
| H | -3.84743500 | -1.49783900 | -2.17093400 |
| O | -0.75367000 | 2.95815500  | 0.23175400  |
| H | -0.41075000 | 3.77952200  | -0.13109700 |
| O | 4.13809900  | -0.95906600 | -0.66738400 |
| C | 2.70531100  | -2.55788200 | 0.34247600  |
| H | 2.49143700  | -2.52576400 | 1.41353200  |
| H | 1.81575500  | -2.94029800 | -0.16360800 |
| H | 3.54658800  | -3.22196200 | 0.15763000  |

## Radical Cation

1 2

|   |             |             |             |
|---|-------------|-------------|-------------|
| C | -0.83583000 | 2.29965600  | 0.60361100  |
| C | -1.85838500 | 1.38007100  | 0.66701000  |
| C | -1.75973200 | 0.11968800  | 0.02536500  |
| C | -0.60943700 | -0.20406500 | -0.65380000 |
| C | 0.46154500  | 0.71450100  | -0.74541000 |
| C | 0.33294500  | 1.97624800  | -0.08978900 |
| H | -0.92818400 | 3.26667300  | 1.08619300  |
| H | -2.77226900 | 1.60244000  | 1.20671100  |
| H | -0.52465000 | -1.15107400 | -1.17422100 |
| C | -2.94961600 | -0.80923000 | 0.12361400  |
| C | 1.72331500  | 0.40209000  | -1.49976300 |
| H | 2.16229700  | 1.27546600  | -1.97447100 |
| H | 1.59389200  | -0.41027800 | -2.20860600 |
| C | 2.41348700  | 0.03484600  | -0.22782800 |
| H | 2.84514600  | 0.86642600  | 0.32079000  |
| C | 2.49643300  | -1.22341800 | 0.33715100  |
| C | 1.86952000  | -2.44219000 | -0.24642300 |
| H | 0.97917200  | -2.69852600 | 0.34219100  |
| H | 1.57607400  | -2.33180200 | -1.28835700 |
| H | 2.55087600  | -3.29148700 | -0.15712100 |
| C | 3.26237800  | -1.41288400 | 1.60057700  |
| H | 4.13562100  | -2.04559500 | 1.40556700  |
| H | 3.59908200  | -0.47367000 | 2.03549000  |
| H | 2.65097600  | -1.95584000 | 2.32937500  |
| O | 1.37113100  | 2.80551600  | -0.20444100 |
| H | 1.19953500  | 3.65846900  | 0.21372800  |
| O | -3.87979200 | -0.48377400 | 0.81409500  |
| C | -2.92181700 | -2.10372200 | -0.64590000 |
| H | -2.80424000 | -1.91326200 | -1.71566700 |

|   |             |             |             |
|---|-------------|-------------|-------------|
| H | -2.08696700 | -2.72932700 | -0.31849400 |
| H | -3.85590900 | -2.63209800 | -0.47082800 |

# Neutral Radical

0 2

|   |             |             |             |
|---|-------------|-------------|-------------|
| C | -1.25855500 | 2.25173600  | 0.55416300  |
| C | -2.20476400 | 1.27668000  | 0.62675800  |
| C | -1.96975700 | 0.00406300  | 0.04249800  |
| C | -0.75742200 | -0.26063800 | -0.61680200 |
| C | 0.23067000  | 0.69367600  | -0.71430400 |
| C | 0.00975700  | 2.01766100  | -0.12018100 |
| H | -1.40433400 | 3.23453100  | 0.98670400  |
| H | -3.15350700 | 1.43718000  | 1.12420400  |
| H | -0.58806700 | -1.23604900 | -1.06069700 |
| C | -3.04688600 | -1.02988000 | 0.16112500  |
| C | 1.56106500  | 0.43034800  | -1.35665900 |
| H | 1.82107700  | 1.28137900  | -1.99017100 |
| H | 1.49767200  | -0.45750800 | -1.98654200 |
| C | 2.62277400  | 0.28414400  | -0.28694800 |
| H | 3.02725600  | 1.22334800  | 0.07977600  |
| C | 3.04796500  | -0.85717400 | 0.25858100  |
| C | 2.53884600  | -2.22546000 | -0.10560300 |
| H | 2.03863200  | -2.67818600 | 0.75696800  |
| H | 1.83626900  | -2.21877900 | -0.93752700 |
| H | 3.37274800  | -2.88352500 | -0.36785800 |
| C | 4.09814700  | -0.85254800 | 1.33695300  |
| H | 4.97372100  | -1.43075700 | 1.02524200  |
| H | 4.42033200  | 0.16002900  | 1.58022300  |
| H | 3.71382200  | -1.32245800 | 2.24796300  |
| O | 0.87431800  | 2.89892800  | -0.20099600 |
| O | -4.07964400 | -0.76383000 | 0.73265000  |
| C | -2.81296400 | -2.39758200 | -0.43839500 |
| H | -2.65783800 | -2.32266500 | -1.51741300 |
| H | -1.92398300 | -2.86132700 | -0.00444500 |
| H | -3.68444300 | -3.01614200 | -0.23677900 |
